# Supplementary material for: An Igh distal enhancer modulates antigen receptor diversity by determining locus conformation
Source: PubMed Central journal article supplement (PMC9984487; doi:10.1038/s41467-023-36414-2), 2023-03-03
Supplement: 41467_2023_36414_MOESM1_ESM.pdf [file 41467_2023_36414_MOESM1_ESM.pdf]

## **An Igh distal enhancer modulates antigen receptor diversity by determining locus conformation**

Khalid H. Bhat<sup>1,2,12</sup>, Saurabh Priyadarshi<sup>1,12</sup>, Sarah Naiyer<sup>1</sup>, Xinyan Qu,<sup>1,3</sup> Hammad Farooq<sup>4</sup>, Eden Kleiman<sup>5,6</sup>, Jeffery Xu,<sup>5,7</sup> Xue Lei,<sup>4,8</sup> Jose F. Cantillo<sup>1,9</sup>, Robert Wuerffel<sup>1,10</sup>, Nicole Baumgarth<sup>11</sup>, Jie Liang<sup>4</sup>, Ann J. Feeney<sup>5</sup> and Amy L. Kenter<sup>1,\*</sup>

1 Department of Microbiology and Immunology, University of Illinois College of Medicine, Chicago, IL 60612-7344, USA

2 Current address: SKUAST Kashmir, Division of Basic Science and Humanities, Faculty of Agriculture, Wadura Sopore-193201, India.

3 Current address: Medpace, Cincinnati, Ohio 45227

4 Department of Bioengineering, University of Illinois Colleges of Engineering and Medicine, Chicago, IL 60612-7344, USA

5 Department of Immunology and Microbiology, IMM-22, Scripps Research, La Jolla, CA 92037, USA

6 Current address: Crown Bioscience, San Diego, CA 92127

7 Current address: Brookwood Baptist Health General Surgery Residency. Birmingham, AL 35211

8 Current Address: Sanford Burnham Prebys Medical Discovery Institute, La Jolla, CA 92037

9 Current address: Immunotek, S.L. Alcala de Henares, Spain

10 Current address: 10441 Circle Dr. Apt 47C, Oak Lawn IL 60453

11 W. Harry Feinstone Dept. Molecular Microbiology and Immunology, Bloomberg School of Public Health, Johns Hopkins University, USA

12 Equal contributions

\* Corresponding Author; e-mail: star1@uic.edu

**SUPPLEMENTARY INFORMATION**

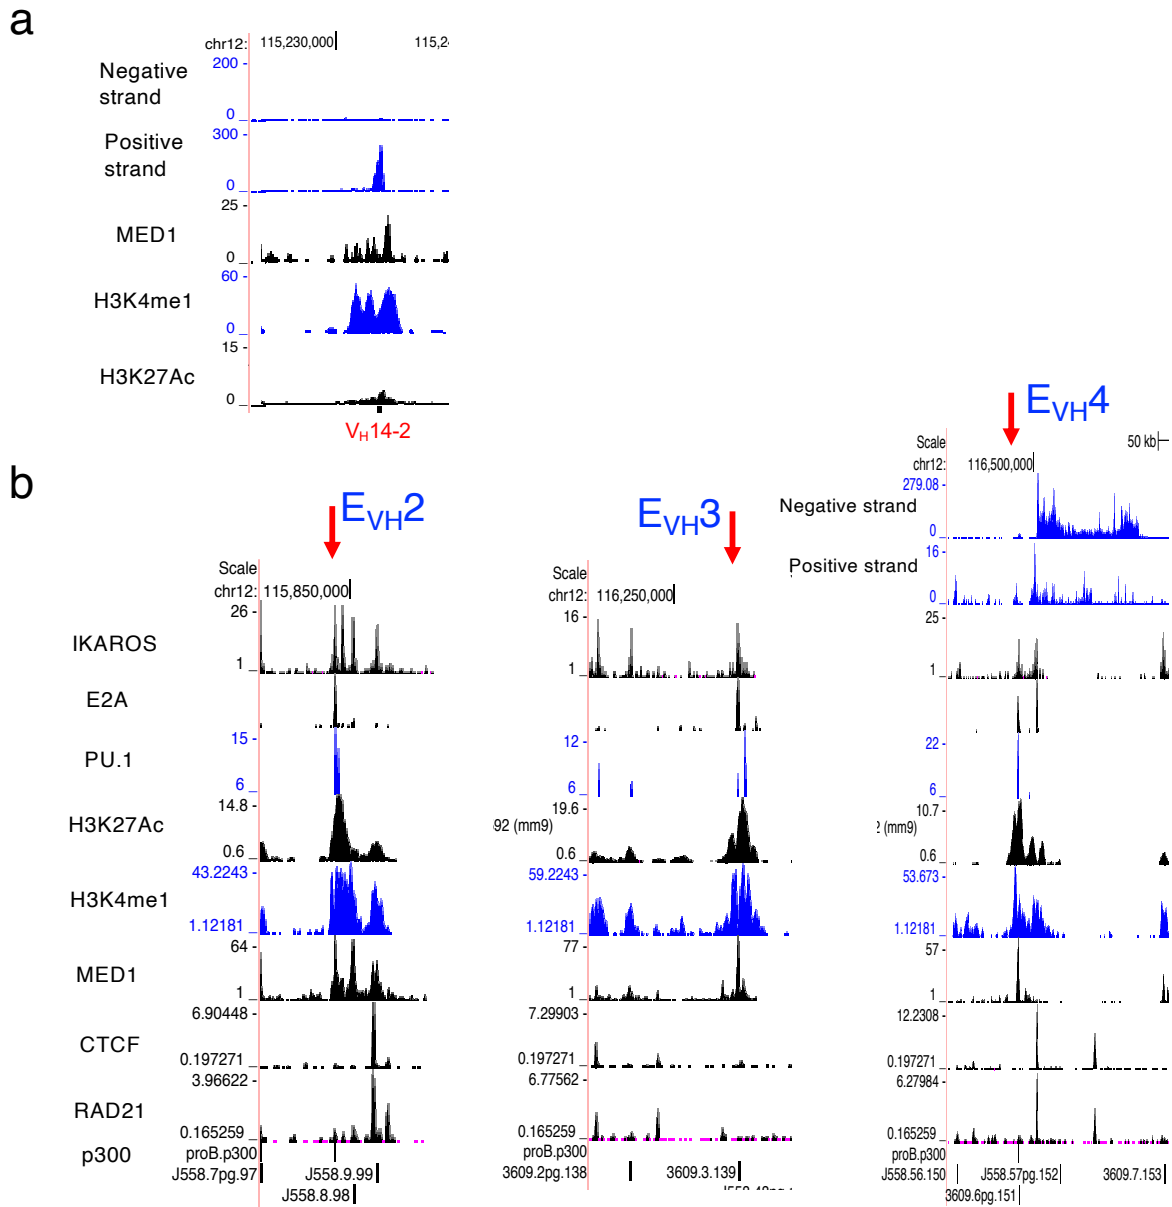

**Supplementary Fig. 1. Histone protein modifications and protein binding factors for  $V_{H14-2}$ ,  $E_{VH2}$ ,  $E_{VH3}$  and  $E_{VH4}$  in the *Igh* locus. **a)** Positive and negative strand RNA-seq and ChIP-seq data for histone modifications H3K27Ac, H3K4me1, and Mediator (MED1) for the  $V_{H14-2}$  gene segment. **b)** ChIP-seq data for H3K27Ac, H3K4me1 and transcription factors p300, RAD21, CTCF, MED1, PU.1, E2A and IKAROS from Rag deficient pro-B cells are shown. Positive and negative strand RNA-seq is shown for  $E_{VH4}$ . The data was compiled in UCSC genome browser using mm9 genome assembly (Supplementary Table 11).**

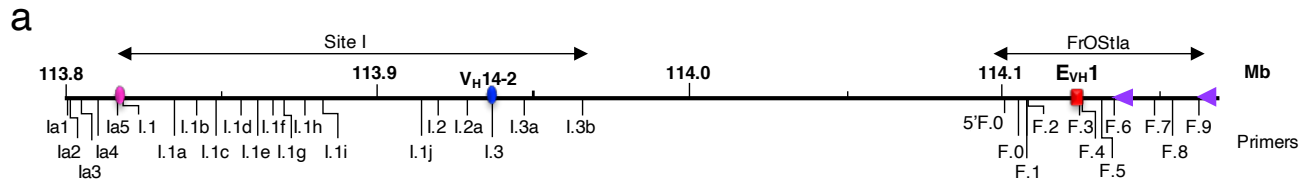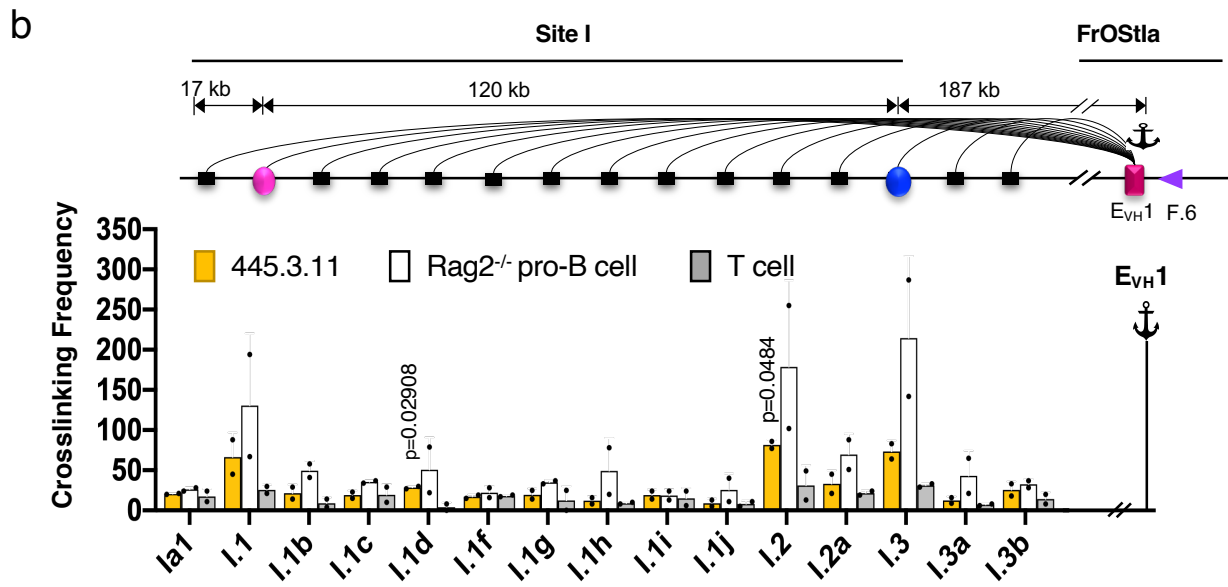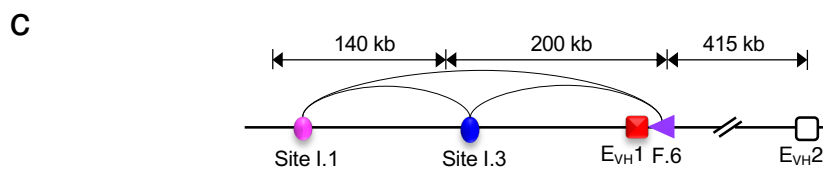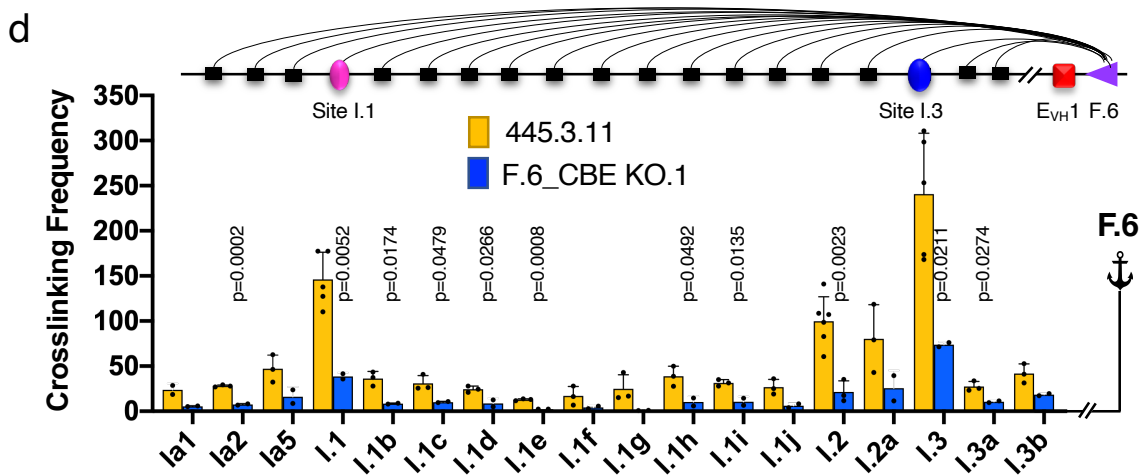

**Supplementary Fig. 2. E<sub>VH</sub>1 and F.6 CBE anchor chromatin loops with Site I. a)** Schematic of primer sites in Site I through FrOStIa highlighting DNA elements ( Site I.1, pink dot; Site I.3, blue dot; E<sub>VH</sub>1, red square; F.6 CBE, purple arrow). Primers positions are labeled and represented by the vertical bars below the line. **b,d)** Source data are provided as a Source Data file. **b)** Average crosslinking frequencies were derived from chromatin samples from Rag2<sup>-/-</sup> pro-B cells (n=2), Abl transformed 445.3.11 pro-B cell line (n=2), ConA stimulated splenic T cells (n=2). *Upper panel:* Arcs represent the 3C assays, primers are identified below the histograms, and anchor probes are indicated (anchor symbol). *Lower panels* 3C interaction profile using E<sub>VH</sub>1 anchor probe and scanning the Site I region. P values from unpaired two-tailed Students t test. **c)** 3C interactions between anchor F.6 and 3C fragments in Site I. **d)** 3C studies using chromatin samples from the control (n=3) except for primers Ia1 (n=2), I.1 and I.3 (n=5), and I.2 (n=6) and from the F.6\_CBE KO.1 (n=2) except for primers I.2 (n=3) and analyzed in duplicate. P values from unpaired two-tailed Students t test.



a

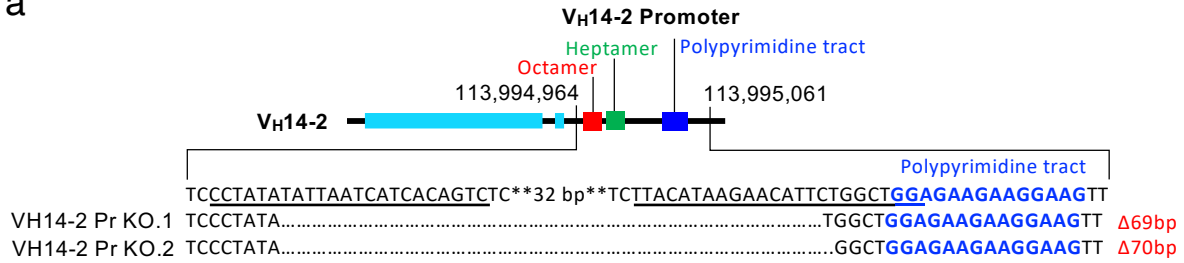

b

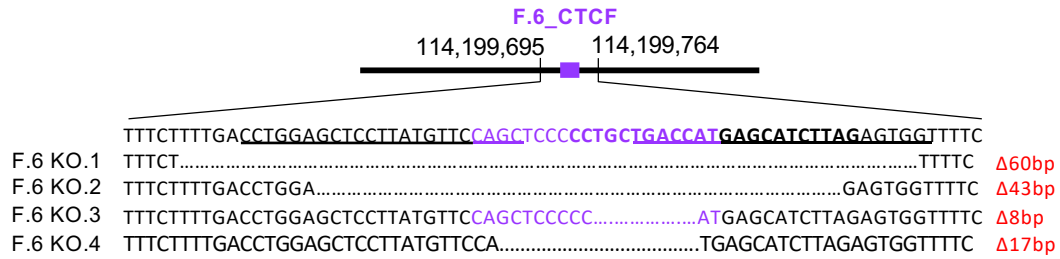

c

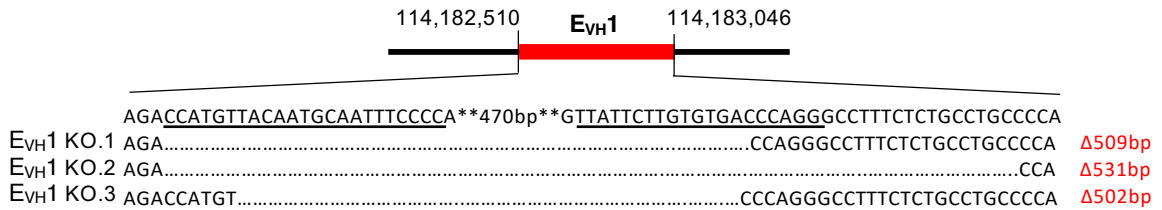

d

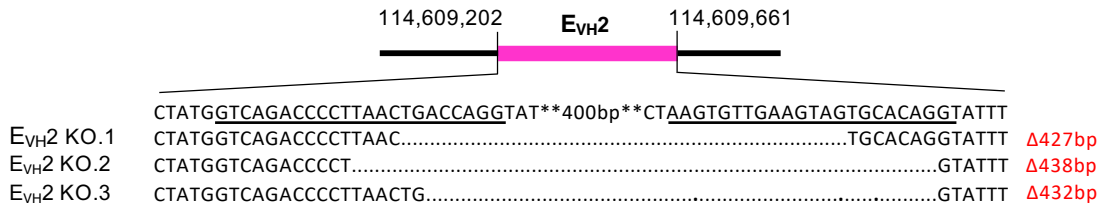

e

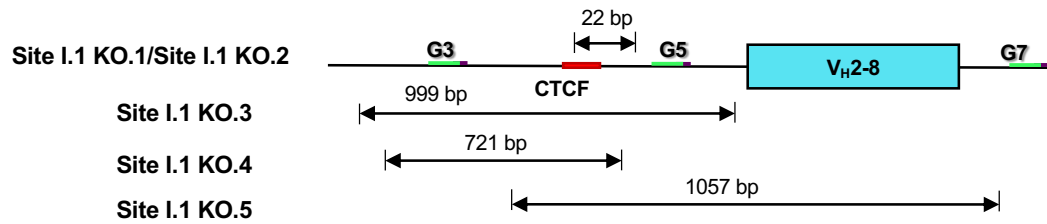

f

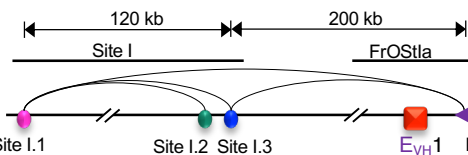

g

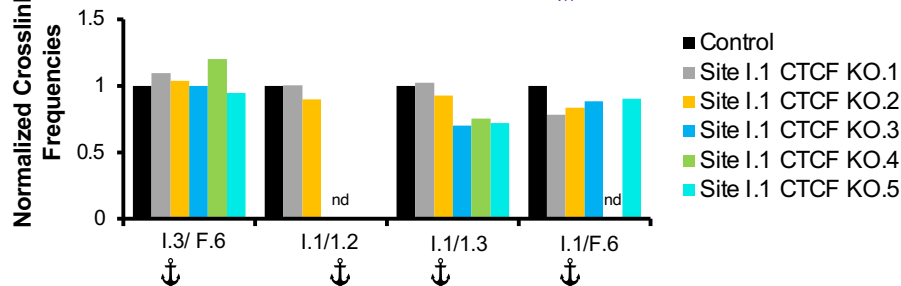

**Supplementary Fig. 3. CRISPR/Cas9 genome editing of TEs in a Abl-t pro-B cell line.** Genomic coordinates (chr12, mm9). **a-d)** Guide (g)RNA sequences are underlined. Deletions ( $\Delta$ ) and their positions are displayed below the parental DNA sequence. **a)** The V<sub>H</sub>14-2 exon and leader (cyan rectangles), octamer (red rectangle), heptamer (green rectangle), polypyrimidine tract (blue rectangle), **b)** F.6 CBE (purple rectangle). KO.1 and KO.3 were obtained using a single gRNA indicated in bold. KO.2 clone was obtained using two guides. **c)** E<sub>VH1</sub> (red rectangle). **d)** E<sub>VH2</sub> (white rectangle). **e)** Summary of the CRISPR editing at Site I.1. Guide RNAs (G3, G5, G7) used for the editing, arrows indicate the positions of deletion, numbers on the arrows indicate the base pairs deleted, red horizontal bar shows CBE, teal rectangle indicates the V<sub>H</sub>2-8 gene. Site I.1 CTCF KO.1 and KO.2 clones were derived from parental line 445.3.11. Site I.1 CTCF KO.3, KO.4 and KO.5 clones were derived from parental line 445.3.8. **f)** Summary of the major loops tested in 3C assays (arcs) with genomic distances between them. **g)** Source data are provided as a Source Data file. Average crosslinking frequencies anchored at Site I.3 and Site I.1 from chromatin samples, 445.3.11 control (n=2); 445.3.8 control (n=2), KO lines (n=2). Average crosslinking frequencies from each control line were normalized to 1.0 (black bar), represented once by the black bar and compared with their matched KO clones (nd, not done).

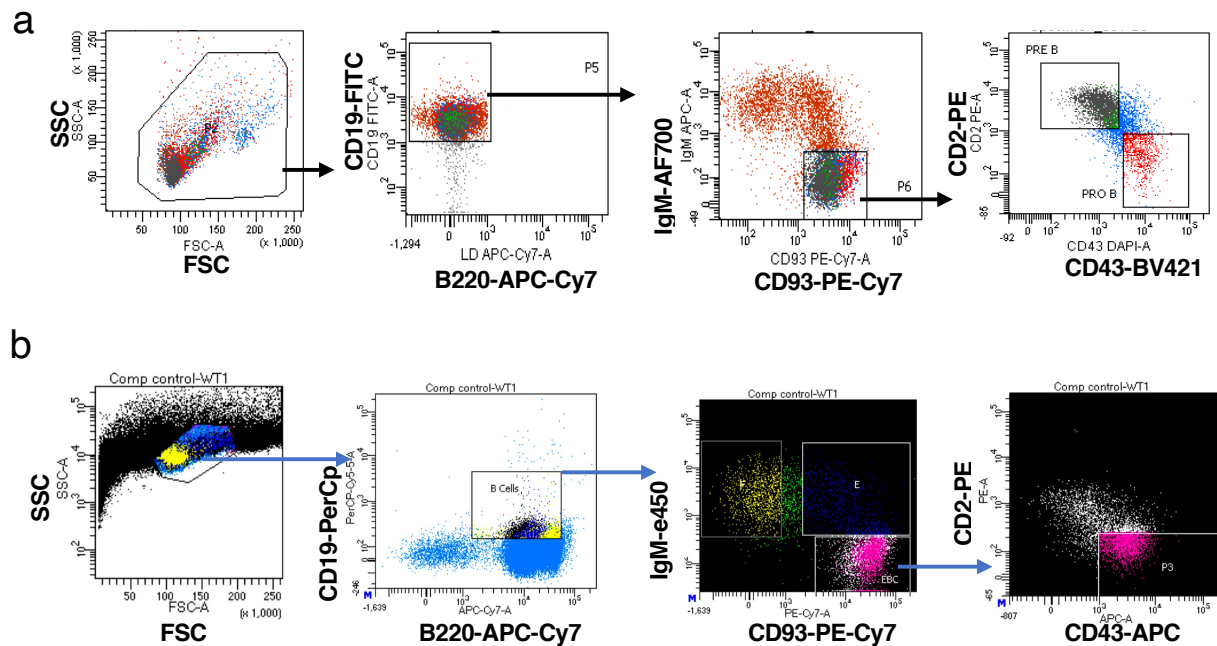

**Supplementary Fig. 4. FACS gating strategy for primary pro-B cell isolation.** Bone marrow (BM) was collected from humerus, tibia and femur bones of WT and  $E_{VH}1^{-/-}$  mice. Representative flow cytometry results are depicted for isolation of WT pro-B cells and essentially identical results were obtained for  $E_{VH}1^{-/-}$  mice. **a)** Sorting protocol for pro-B cell purification used in VDJ-seq. CD19<sup>+</sup> cells were isolated from WT and  $E_{VH}1^{-/-}$  BM using CD19-conjugated MACS beads. CD19<sup>+</sup> cells were stained with antibodies to CD19-FITC, B220-APC-Cy7, CD93-PE-Cy7, CD2-PE, CD43-BV421 and IgM-AF700. Sorted pro-B cells (CD19<sup>+</sup>CD93<sup>+</sup>IgM<sup>-</sup> CD2<sup>-</sup>CD43<sup>+</sup>) were used to isolate gDNA. Data is representative of at least three independent experiments +/- SEM. **b)** The FACS gating strategy for pro-B cell purification used in qPCR (see Figure 4F-H). CD19<sup>+</sup> cells were first isolated using CD19-conjugated MACS beads. CD19<sup>+</sup> cells were stained with antibodies to CD19-PerCP, B220-APC-Cy7, CD93-PE-Cy7, CD2-PE, CD43-APC and IgM-e450 and were sorted on a BD FACSAria Fusion 5-18 using BD FACS Diva 8.0.1 software. FACS purified pro-B cells (CD19<sup>+</sup>B220<sup>+</sup>CD93<sup>+</sup> IgM<sup>-</sup>CD2<sup>-</sup>CD43<sup>+</sup>) were used to isolate gDNA for qPCR and repertoire analysis shown in Figure 4F-H. FACS data is representative of at least three independent experiments +/- SEM.

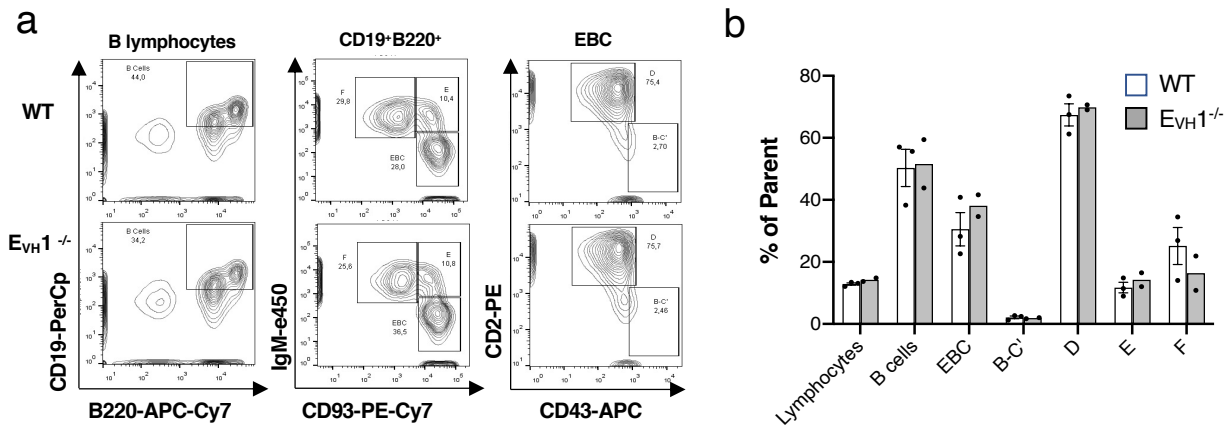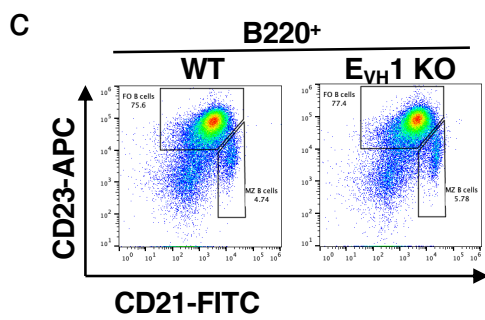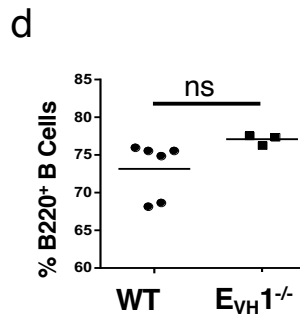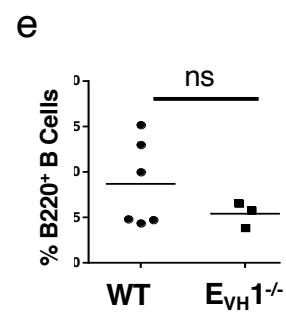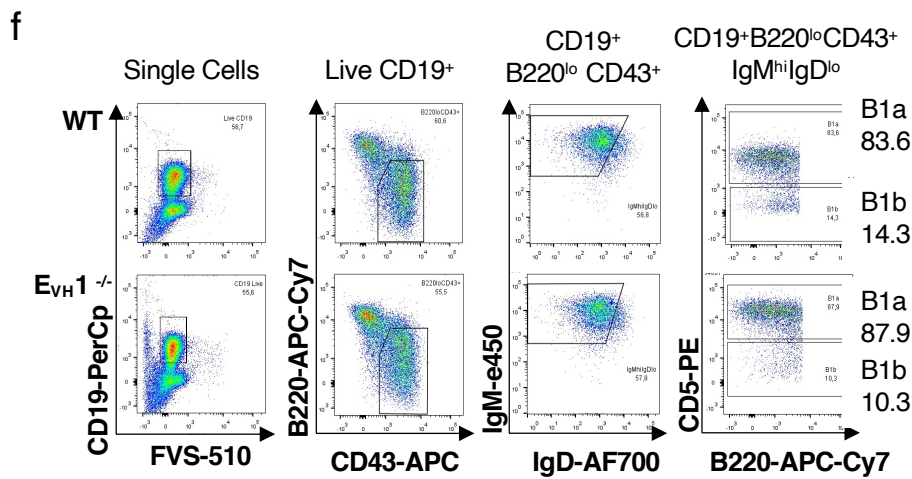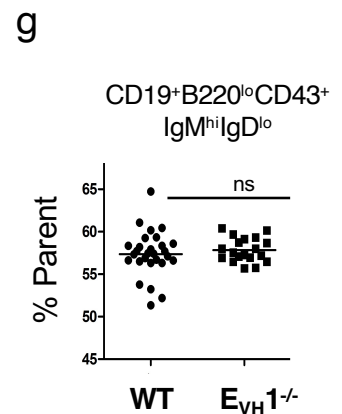

**Supplementary Fig. 5. B cell compartments are normal in  $E_{VH}1^{-/-}$  mice. a) Analysis of Hardy fractions in BM. a)** BM was collected from humerus, tibia and femur bones of WT, and  $E_{VH}1^{-/-}$  mice. Cells were stained with antibodies (CD19-PerCp, B220-APC Cy7, IgM-e450, CD93-PE-Cy7, CD43-APC, CD2-PE). Representative histograms (WT, n=3;  $E_{VH}1^{-/-}$ , n=2) depicting different B cell fractions. B lymphocytes (B220+CD19+), early B cells (EBC; B220+CD93+), pro-B cells (B220+CD19+CD93+CD2-CD43+IgM<sup>-</sup>; similar to Hardy fractions B-C'), pre-B cells (B220+CD19+CD93+CD2+CD43-IgM<sup>-</sup>; similar to Hardy fraction D), immature B cells (B220+CD19+CD93+IgM<sup>+</sup>; similar to Hardy fraction E) mature B cells (B220+CD19+CD93-IgM<sup>+</sup>; similar to Hardy fraction F). **b)** The graph represents the percent of parent gated population for each early B cell fraction with SEM. (WT, n=3;  $E_{VH}1^{-/-}$ , n=2). **c-e)** WT, n=6;  $E_{VH}1^{-/-}$ , n=3 mice. **c)** Representative analyses for follicular and marginal zone B cells from C57BL/6 (WT) and  $E_{VH}1^{-/-}$  spleens. Spleen cells were stained with antibodies (B220-PE, CD21-FITC and CD23-Biotin + Streptavidin-APC) and analyzed by flow cytometry for the presence of follicular (B220<sup>+</sup>CD21<sup>lo</sup>CD23<sup>hi</sup>) and marginal zone (B220<sup>+</sup>CD21<sup>hi</sup>CD23<sup>lo</sup>) B cells. **d,e)** Graphs for follicular (**d**) and marginal zone (**e**) B cells are a representative of two independent experiments. **e,g)** Horizontal bar indicates the mean and each symbol represents a single mouse. P values from two-tailed unpaired Student's t-test, ns = not significant. **f,g)** WT, n=35,  $E_{VH}1^{-/-}$ , n=19 mice. **f)** Representative analyses for peritoneal B1 B cells from WT and  $E_{VH}1^{-/-}$  mice were stained with antibodies (CD19-PerCp, B220-APC Cy7, CD43 (S7)-APC, IgM-e450, IgD AF700, CD5-PE and vital dye FVS-510). **g)** The graphs represent data from three independent experiments.

Supplementary Figure 6

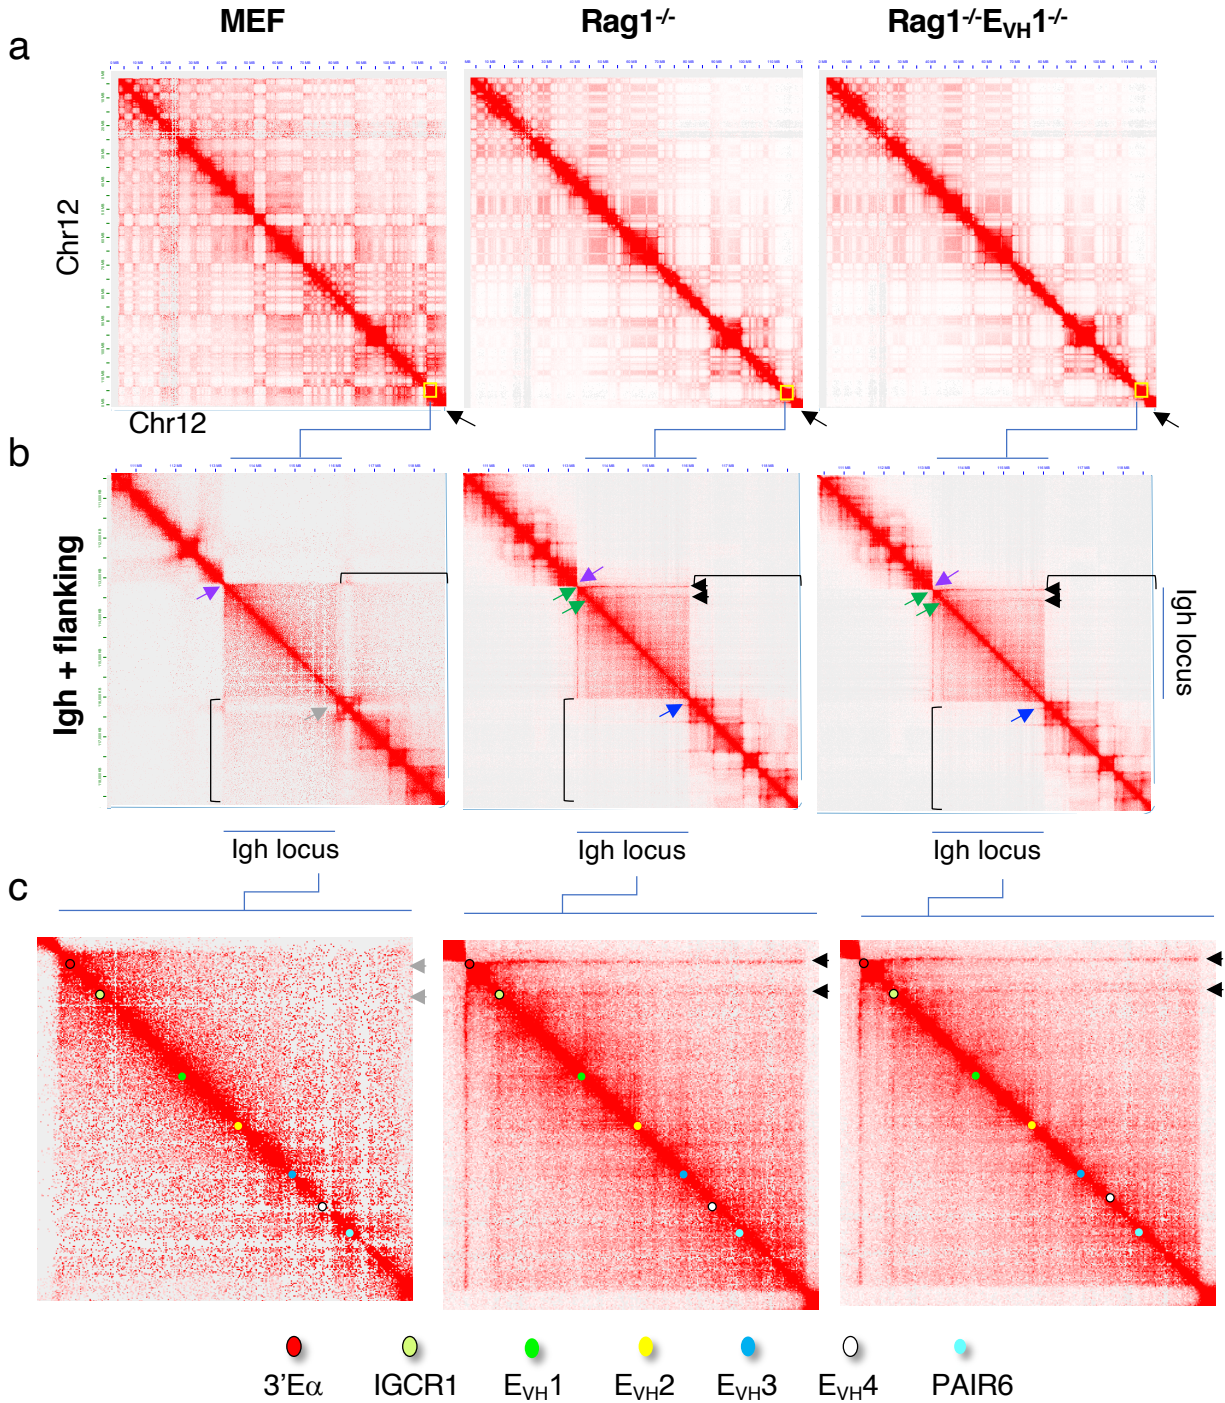

**Supplementary Figure 6. Hi-C contact maps derived from MEF, Rag1<sup>-/-</sup> and Rag1<sup>-/-</sup>E<sub>VH</sub>1 pro-B cells.** Hi-C heatmaps were generated from two biological replicates of Rag1<sup>-/-</sup> and Rag1<sup>-/-</sup>E<sub>VH</sub>1<sup>-/-</sup> CD19<sup>+</sup> pro-B cells that yielded a minimum of 1.3 billion read pairs and 0.72 billion contacts for each sample with a 10kb bin resolution (Suppl. Table 11). The Hi-C data was KR normalized and the contact maps were generated using Juicebox and are at 10kb resolution. **a)** Hi-C heatmaps for chromosome 12 depicting compartments and TADs. Igh TAD (yellow box) indicated by the black arrow. **b)** Hi-C contact maps of the Igh locus and flanking regions spanning approximately chr12:110,500,000-118,500,000 (mm10). Igh locus TAD boundaries (3' end, purple arrow; 5' end, blue arrow; lost 5' boundary, gray arrow) Igh locus architectural stripes (black arrows). Compartments adjacent to the Igh locus (black brackets). **c)** Expanded Hi-C contact maps of the Igh locus from **(b)**. Igh locus architectural stripes are present in Rag1<sup>-/-</sup> and Rag1<sup>-/-</sup>E<sub>VH</sub>1<sup>-/-</sup> pro-B cells (black arrows) and absent in MEF (gray arrows). Regulatory elements (colored dots) are arrayed along the Hi-C diagonal and are identified at bottom.



# Supplementary Figure 7

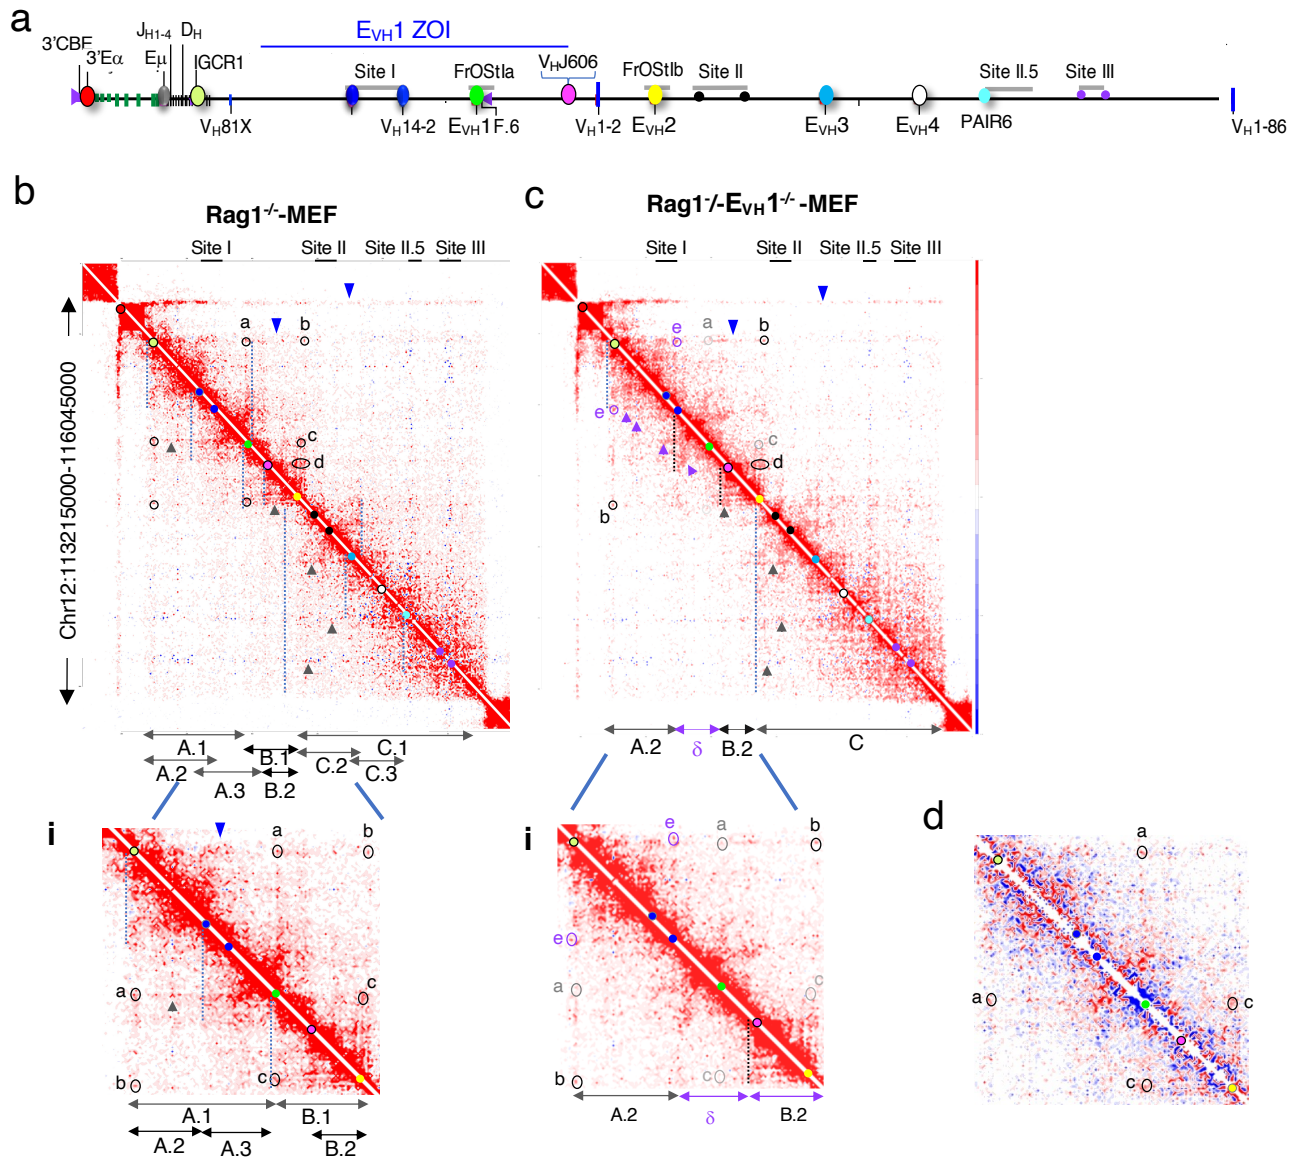



**Supplementary Fig. 7. Hi-C difference maps of the Igh locus expanded for subTADs A-B.**

**a)** Schematic of the Igh locus with regulatory elements indicated (colored dots) **b,c)** Quantile normalized MEF Hi-C read frequencies were subtracted from quantile normalized read frequencies of Rag1<sup>-/-</sup> and Rag1<sup>-/-</sup>E<sub>VH</sub>1<sup>-/-</sup> pro-B cell samples to construct difference maps. Hi-C difference maps at 10kb resolution from Rag1<sup>-/-</sup>-MEF (**b**) and Rag1<sup>-/-</sup>E<sub>VH</sub>1<sup>-/-</sup>-MEF (**c**) pro-B cells for the Igh locus (chr12:113220000-116010000) are identical to those shown in Figure 6B. Nested loop domains (dashed vertical lines), stripes (3'→5', blue triangles; 5'→3' black triangles), dots (black circles), lost dots (gray circles). Rag1<sup>-/-</sup>E<sub>VH</sub>1<sup>-/-</sup> specific stripes (purple triangles) and dots (purple circles). Major landmarks, SiteI, SiteII, SiteII.5 and SiteIII are shown on top marked by black lines. The colored circles along the diagonal correspond to regulatory elements shown in the schematic of the Igh locus (**a**). **bi, ci)** Expanded Hi-C difference maps spanning the region IGCR1-E<sub>VH</sub>2 are shown for Rag1<sup>-/-</sup>-MEF (**bi**) and Rag1<sup>-/-</sup>E<sub>VH</sub>1<sup>-/-</sup>-MEF (**ci**) pro-B cells to highlight the differences between these genotypes. **d)** The Hi-C Rag1<sup>-/-</sup>-MEF and Rag1<sup>-/-</sup>E<sub>VH</sub>1<sup>-/-</sup>-MEF difference maps were subtracted from each other to visualize differences between Rag1<sup>-/-</sup> (red intensities) versus Rag1<sup>-/-</sup>E<sub>VH</sub>1<sup>-/-</sup> (blue intensities) on the same heatmap. The expanded region spanning IGCR1-NE2 shown in the new Rag1<sup>-/-</sup>-MEF minus Rag1<sup>-/-</sup>E<sub>VH</sub>1<sup>-/-</sup>-MEF difference map. The colored circles along the diagonal correspond to regulatory elements shown in the schematic of the Igh locus (**a**). Selected dots (black circles) are shown as points of reference.

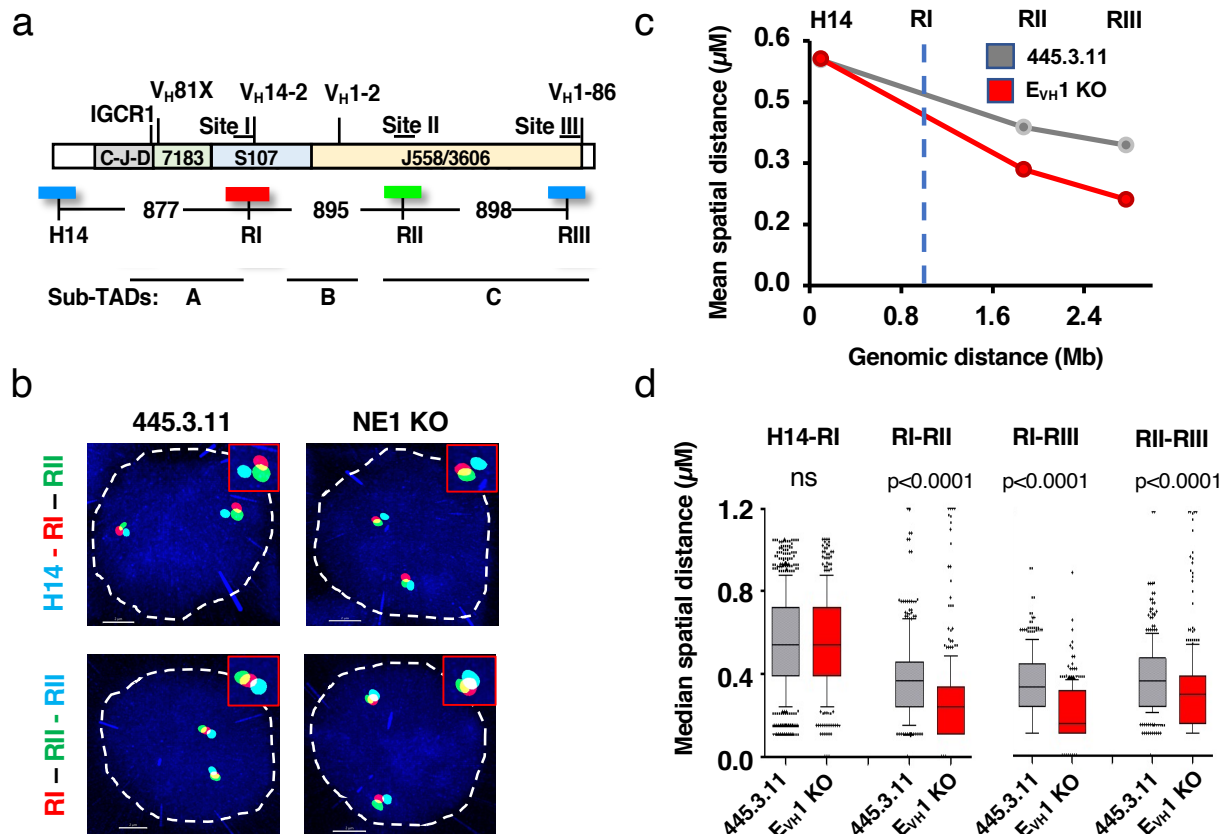

**Supplementary Fig. 8. E<sub>VH</sub>1 modulates Igh locus topology and compaction in Abelson transformed pro-B cell line.** **a)** Schematic of the Igh locus, with FISH probes used in two independent experiments. BAC probes were labeled with AlexaFluor 647 (H14, RIII; blue), AlexaFluor 555 (RI; red), AlexaFluor 488 (RII; green). **b-d)** Source data are provided as a Source Data file. **b)** Representative nuclei from fixed 445.3.11 and E<sub>VH</sub>1 KO cell lines hybridized simultaneously with labeled probes. N=302 alleles/genotype for the RI-RII, RI-RIII, RII-RIII probe combinations. N=922 (445.3.11 Abl-t line) and 366 (E<sub>VH</sub>1 KO) for H14-RI probe combination analyzed in two independent experiments. Scale = 2 μM. **c)** Mean spatial distances (y-axis) were plotted as a function of genomic distance (x-axis) for 302 alleles from two independent experiments for each probe combination. Lines indicate connectivity only. The RI anchor probe position is indicated by a vertical dashed line. **d)** Boxplots show the median (middle line), 25<sup>th</sup> and 75<sup>th</sup> percentile (box), 10<sup>th</sup> and 90<sup>th</sup> percentile (whiskers) and 10% outliers (single dots). P values (<0.0001, \*\*\*\*), two tail Mann-Whitney U test.

**Supplementary Table 1. Antibodies and reagents**

| Antibodies /Reagents                            | Name/Clone                                                                                                                                   | Source                                                 | Identifier                                                                                                 | FACS Ab dil                    | Flow cytometry Ab dil                | ChIP Ab dil |
|-------------------------------------------------|----------------------------------------------------------------------------------------------------------------------------------------------|--------------------------------------------------------|------------------------------------------------------------------------------------------------------------|--------------------------------|--------------------------------------|-------------|
| CD19-FITC                                       | Rat anti mouse monoclonal/B4                                                                                                                 | Biologend                                              | Cat#115505<br>RRID:AB_313640                                                                               | 3/100*                         |                                      |             |
| CD93<br>PECy7<br>IgM Fab-<br>AF647              | PE/Cyanine7 anti-mouse<br>CD93/AA4.1 (RUO)<br>Alexa Fluor® 647<br>AffiniPure Fab Fragment<br>Goat Anti-Mouse IgM/<br>Polyclonal              | Biologend<br><br>Jackson<br>Immuno<br>Research         | Cat#136506;<br>RRID_AB_2044012<br>Cat#115-607-020;<br>RRID:AB_2338932                                      | 3/100*<br><br>1.5/100*         |                                      |             |
| CD2-PE                                          | PE anti-mouse CD2<br>antibody/RM2-5 (RUO)                                                                                                    | Biologend                                              | Cat#100108;<br>RRID:AB_2073690                                                                             | 3/100*<br>1/50¶                | 1/2500#                              |             |
| CD43-<br>BV421<br>B220-APC-<br>Cy7              | BV421 Rat anti-mouse<br>CD43/S7 (RUO)<br>CD45R (B220)<br>monoclonal antibody/RA<br>3-6B2 (APC-eFluor 780)                                    | BD<br>Biosciences<br>eBioscience                       | Cat # 562958;<br>RRID:AB_2738069<br>Cat # 47-0452-82<br>RRID:Ab_1518810                                    | 3/100*<br><br>1/100*<br>3/100¶ | 3/100#,!,\$                          |             |
| CD19-<br>PerCp<br>CD43 (S7)-<br>APC<br>IgM-e450 | PerCP anti-mouse CD19<br>antibody/6D5 (RUO)<br>APC rat anti-mouse<br>CD43/S7 (RUO)<br>IgM Monoclonal<br>antibody/ eB121-15F9<br>(eFluor 450) | Biologend<br><br>BD<br>Biosciences<br>eBioscience<br>™ | Cat # 115532<br>RRID:AB_2665409<br>Cat # 560663<br>RRID:AB_1727479<br>Cat # 48-5890-82<br>RRID:AB_10671539 | 1/40¶<br><br>1/100¶<br>1/50¶   | 1/40!,\$<br>1/100#,!,\$<br>1/100#,\$ |             |
| CD93-PE<br>Cy7                                  | CD93 monoclonal<br>antibody/AA4.1 (PE-<br>Cyanine7)                                                                                          | eBioscience<br>™                                       | Cat # 25-5892-81<br>RRID:AB_469658                                                                         | 1/50¶                          | 1/50#,!\$                            |             |
| IgD-AF700                                       | Alexa Fluor® 700 anti-<br>mouse IgD antibody/11-<br>26c.2a (RUO)                                                                             | Biologend                                              | Cat # 405730<br>RRID:AB_2563341                                                                            |                                | 1/50\$                               |             |
| CD5-PE                                          | PE anti-mouse CD5<br>antibody/53-7.3 (RUO)                                                                                                   | Biologend                                              | Cat # 100608<br>RRID:AB_312737                                                                             |                                | 1/1000\$                             |             |
| CD23-FITC                                       | FITC anti-mouse CD23<br>monoclonal<br>antibody/B3B4 (RUO)                                                                                    | Biologend                                              | Cat # 101605<br>RRID:AB_312830                                                                             |                                | 1/50\$                               |             |
| CD23-biotin                                     | Biotin Anti-Mouse CD23<br>/B3B4 (RUO)                                                                                                        | BD<br>Biosciences                                      | Cat #553137<br>RRID:AB_394652                                                                              |                                | 1/50!,\$                             |             |
| CD21-FITC                                       | Rat Anti-CD21 / CD35<br>Monoclonal<br>Antibody/7G6                                                                                           | BD<br>Biosciences                                      | Cat #553818<br>RRID:AB_395070                                                                              |                                | 1/100!                               |             |
| Streptavidin-<br>APC                            | Streptavidin-<br>allophycocyanin<br>antibody                                                                                                 | BD<br>Biosciences                                      | Cat #554067<br>RRID:AB_10050396                                                                            |                                | 1/500!                               |             |
| CD16/32 Fc<br>Block                             | Purified anti-mouse<br>CD16/32 Antibody/93<br>(RUO)                                                                                          | Biologend                                              | Cat# 101302;<br>RRID:AB_312801                                                                             | 1/50*,<br>¶,#                  | 1/50!,\$                             |             |
| CTCF                                            | Rabbit Anti-CTCF<br>Polyclonal antibody                                                                                                      | Millipore<br>Sigma                                     | Cat# 07-729<br>RRID:AB_441965                                                                              |                                |                                      | 1/450       |
| CD19<br>conjugated<br>MACS<br>beads             | CD19 microbeads<br>mouse                                                                                                                     | Miltenyi<br>Biotech                                    | Cat# 130-052-201<br>RRID: AB_2827612                                                                       |                                |                                      |             |
| FVS-510*                                        | Fixable Viability Stain<br>510 (RUO)                                                                                                         | BD<br>Horizon™                                         | Cat # 564406<br>RRID:AB_2869572                                                                            |                                | 1/5000#,!\$                          |             |

\* FACS: purification of pro-B cells for VDJ-seq

¶ FACS: purification of pro-B cells for qPCR repertoire analysis

# Flow cytometry analysis of pro-B cells (and Hardy fractions)

! Flow cytometry analysis of splenic B cells

\$ Flow cytometry analysis of splenic B1 cells

**Supplementary Table 2. Primers for qPCR and qRT-PCR assays.**

| Name                  | Sequence                       | Reference  |
|-----------------------|--------------------------------|------------|
| I $\gamma$ 2b F       | ATCCCAGAGTCACAGAGGAA           | 1          |
| C $\gamma$ 2b R       | CACACCTACAGACAACCAGAC          | 2          |
| I $\mu$ F             | TCCACACAAAGACTCTGGACC          | 1          |
| C $\mu$ R             | TCAGTGTTGTTCTGGTAGTTCCAG       | 1          |
| V <sub>H</sub> 14-2 F | TGGAATTTTCGGGGCATATTTAGTTTCACC | This study |
| V <sub>H</sub> 14-2 R | TCATCTTCTTCTGATGGCAGTGGTTAC    | This study |
| DQ52 F                | CGGACAGAGCAGGCAGGTGG           | 3          |
| DQ52 R                | GCATCCAAGCCTCAGAACTCAG         | 3          |
| V <sub>H</sub> 81X F  | AAGTGGGGGACGAGGAAGAC           | 3          |
| V <sub>H</sub> 81X R  | CTGGGGGGGTGTGTTTCC             | 3          |
| 7183 F                | CACAGTGAGATTCAGAACCCTTA        | 3          |
| 7183 R                | GAAATGAGGAAGGCAGGCG            | 3          |
| J606 F                | AGGTTAGTCTGGTGAGGCATA          | 4          |
| J606 R                | CCAACCTACTCTAACCTCTGCTA        | 4          |
| J558 F                | ATTCCCCTCCCAATAGGAAA           | 5          |
| J558 R                | TGTCAATCACAATGGGCATC           | 5          |
| VHJ558 GLT F          | ATGGGATGGAGCTGGATCTT           | 6          |
| VHJ558 GLT R          | CTCAGGATGTGGTTACAACACTGTG      | 7          |
| PAIR4 F               | ATGGGGCACATAGGTTCTTCC          | 8          |
| PAIR4 R               | GGACATCTGAGAGATCATTGAACATC     | 8          |
| VH81XRT FP            | CCCAAGACATGTCATGGGAAGGGAATTC   | This study |
| VH81XRT RP            | ATGGACTTCGGGCTCAGCTTGG         | This study |
| VHQ52.7.18 RT<br>FP   | CAGTCTGGACATGAAAGCTGCATTG      | This study |
| VHQ52.7.18 RT<br>RP   | CTGTCCTGGTGCTGCTCC             | This study |
| 18SF                  | TTGACGGAAGGGCACCACCAG          | 9          |
| 18SR                  | GCACCACCACCCACGGAATCG          | 9          |

**Supplementary Table 3: Guide RNAs for CRISPR/Cas9 genome editing.**

| <b>Sites</b>      | <b>gRNA</b>        | <b>Sequence (Bold = PAM)</b>                                        | <b>Clones/Mice</b>                                                                                                                                                                       |
|-------------------|--------------------|---------------------------------------------------------------------|------------------------------------------------------------------------------------------------------------------------------------------------------------------------------------------|
| Site1.3           | Site 1.3<br>g5     | TTACATAAGAACATTCTGGCT <b>GG</b>                                     | V <sub>H</sub> 14-2 Pr KO.1,<br>V <sub>H</sub> 14-2 Pr KO.2                                                                                                                              |
|                   | Site 1.3<br>g6     | GACTGTGATGATTAATATAT <b>AGG</b>                                     |                                                                                                                                                                                          |
| F.6               | F.6 g1             | CTAAGATGCTCATGGTCAGC <b>AGG</b>                                     | F.6_CBE KO.1,<br>F.6_CBE KO.3<br>F.6_CBE KO.2                                                                                                                                            |
| F.6               | F.6 g2<br>F.6 g3   | TGACCATGAGCATCTTAGAG <b>TGG</b><br>GCTGGAACATAAGGAGCTCC <b>AGG</b>  |                                                                                                                                                                                          |
| E <sub>VH</sub> 1 | EVH1 g1<br>EVH1 g3 | GGGGAAATTGCATTGTAACAT <b>TGG</b><br>GGGTTATTCTTGTGTGACCC <b>AGG</b> | E <sub>VH</sub> 1 KO.1, E <sub>VH</sub> 1<br>KO.2<br>E <sub>VH</sub> 1 KO.3                                                                                                              |
|                   | E <sub>VH</sub> 2  | EVH2 g1<br>EVH2 g2                                                  |                                                                                                                                                                                          |
| E <sub>VH</sub> 1 | EVH1 g1<br>EVH1 g3 | GGGGAAATTGCATTGTAACAT <b>TGG</b><br>GGGTTATTCTTGTGTGACCC <b>AGG</b> | E <sub>VH</sub> 2 KO.1, E <sub>VH</sub> 2<br>KO.2<br>E <sub>VH</sub> 2 KO.3, E <sub>VH</sub> 2<br>KO.4<br>E <sub>VH</sub> 1 <sup>-/-</sup> mice<br>E <sub>VH</sub> 1 <sup>-/-</sup> mice |

**Supplementary Table 4: Primers for genotyping CRISPR/Cas9 edited cell lines and mice**

| <b>Name</b>  | <b>Sequence</b>                        | <b>Reference</b>       |
|--------------|----------------------------------------|------------------------|
| c_Sitel.3 F1 | AGTGAAGAGCTGGGCAAAATATAGC              | This Study             |
| c_Sitel.3 R1 | GAATGCACATATTTCTGAGGCATG               | This Study             |
| c_Sitel.3 F2 | ATTTGCATACTCATGAGGCAGGATC              | This Study             |
| c_Sitel.3 R2 | CTGCACATGTCTCAGCGAAAT                  | This Study             |
| c_F.6 F      | TTCTGTCTGAGCTCCCAATTTACTTTTCCTT        | This Study             |
| c_F.6 R      | GGAGAAGGATTGTGAATTGAAAATTACTCTAAATGGTT | This Study             |
| c_EVH1 F1    | GTCTAAACATATTTTGTAGGGTA                | This study             |
| c_EVH1 R1    | GATCACTTACTCTCAAATCGAGAC               | This study             |
| c_EVH1 EP F  | TTGTCTAAACATATTTTGTAGGGTATATTTGAA      | This study             |
| c_EVH1 EP R  | GGTTCATTGAGTCACAAGGTAGTTC              | This study             |
| c_EVH1 IP F  | CCATGTTACAATGCAATTTCCCC                | This study             |
| c_EVH1 IP R  | CTGGGTCACACAAGAATAACCC                 | This study             |
| c_EVH2 F     | AAACATTTGAGGTACAGAACAT                 | This Study             |
| c_EVH2 R     | TCTAGGAAGACCTATTATTGCT                 | This Study             |
| Rag2 WT      | TCGATTCCCTAGAGCGTCCTT                  | The Jackson Laboratory |
| Rag2 KO      | GGTCATCCTTTGCAACACAG                   | The Jackson Laboratory |
| Rag2 Common  | CAGCGCTCCTCCTGATACTC                   | The Jackson Laboratory |
| Rag1 0189    | TGGATGTGGAATGTGTGCGAG                  | The Jackson Laboratory |
| Rag1 3104    | CCGGACAAGTTTTTTCATCGT                  | The Jackson Laboratory |
| Rag1 1746C   | GAGGTTCCGCTACGACTCTG                   | The Jackson Laboratory |

**Supplementary Table 5. Primers used for D<sub>H</sub>->J<sub>H</sub> and V<sub>H</sub>->D<sub>H</sub>J<sub>H</sub> recombination assays.**

| Name      | Sequence                        | Reference  |
|-----------|---------------------------------|------------|
| VH81XF    | GAAACTCTCCTGTGAATCCAATGAATACGAA | This study |
| VHJ558    | CCTCCARCACAGCCTACATGSA          | 11         |
| VH7183 F  | CCGATTCACCATCTCCAGAGAC          | 11         |
| DFL16.1 F | ACACCTGCAAAACCAGAGACCATA        | 12         |
| JH1 R     | CCCAGACATCGAAGTACCAGTAG         | This study |

**Supplementary Table 6. Primers used for the short FISH probes**

| Name                | Primer Sequence                    | Reference  |
|---------------------|------------------------------------|------------|
| E <sub>μ</sub> F    | CCCACAGGCTCGAGAACTTTAGCGAC         | 13         |
| E <sub>μ</sub> R    | GCTGGAGAGTTAGTCCAGCCGAC            | This study |
| Site I.3 F          | GAGTAAAAAGGAATCACCCCTTTTAAAACTAAGC | This study |
| Site I.3 R          | TGAGTGTCTTAAGTCTGCTGC              | This study |
| E <sub>VH</sub> 1 F | TAGATCCCTGAAAGATGAGATTG            | This study |
| E <sub>VH</sub> 1 R | CAGTTGAACCCAGAGGTAAG               | This study |
| E <sub>VH</sub> 2 F | GCTCCAAGCAGAGAGTGTATTC             | This study |
| E <sub>VH</sub> 2 R | CTCAGGCCCTCAAGTGTTATTC             | This study |
| 3'E <sub>α</sub> F  | GGGTAACCCAGGAGAAATATAAGC           | 13         |
| 3'E <sub>α</sub> R  | GCTAGATGATGGGAGAGGATAGGTC          | 13         |

**Supplementary Table 7. Statistical analysis of pairwise FISH probe contacts<sup>1</sup>.**

| Experiments       | Probes                                               | Samples                                                                    | Alleles measured <sup>2</sup>                   | P value <sup>3</sup> |
|-------------------|------------------------------------------------------|----------------------------------------------------------------------------|-------------------------------------------------|----------------------|
| <b>Mouse</b>      |                                                      |                                                                            |                                                 |                      |
| 1                 | BAC H14 - RI                                         | Rag2 <sup>-/-</sup> vs Rag2 <sup>-/-</sup> E <sub>VH1</sub> <sup>-/-</sup> | (H14, RI) 400, 400                              | 0.1702               |
| 2                 | BAC RI - RII - RIII                                  | Rag2 <sup>-/-</sup> vs Rag2 <sup>-/-</sup> E <sub>VH1</sub> <sup>-/-</sup> | (RI, RII) 400, 400                              | 0.0004               |
|                   |                                                      |                                                                            | (RII, RIII) 400, 400                            | 0.0890               |
|                   |                                                      |                                                                            | (RI, RIII) 400, 400                             | <0.00001             |
|                   | BAC E <sub>μ</sub> - RI - RIII                       | Rag2 <sup>-/-</sup> vs Rag2 <sup>-/-</sup> E <sub>VH1</sub> <sup>-/-</sup> | (E <sub>μ</sub> , RI) 922, 566                  | 0.0350               |
|                   |                                                      |                                                                            | (R, RIII) 922, 566                              | <0.00001             |
|                   |                                                      |                                                                            | (E <sub>μ</sub> , RIII) 922, 566                | <0.00001             |
| 3                 | E <sub>μ</sub> - E <sub>VH1</sub> - E <sub>VH2</sub> | Rag2 <sup>-/-</sup> vs Rag2 <sup>-/-</sup> E <sub>VH1</sub> <sup>-/-</sup> | (E <sub>μ</sub> , E <sub>VH1</sub> ) 400, 400   | 0.7231               |
|                   |                                                      |                                                                            | (E <sub>VH1</sub> , E <sub>VH2</sub> ) 400, 400 | 0.0312               |
|                   |                                                      |                                                                            | (E <sub>μ</sub> , E <sub>VH2</sub> ) 400, 400   | <0.00001             |
| <b>Cell lines</b> |                                                      |                                                                            |                                                 |                      |
| 4.1               | 3'E <sub>α</sub> - E <sub>μ</sub>                    | 445.3.11 vs V <sub>H</sub> Pr KO                                           | (3'E <sub>α</sub> , E <sub>μ</sub> ) 404, 404   | 0.0988               |
| 4.2               |                                                      | 445.3.11 vs E <sub>VH1</sub> KO                                            | (3'E <sub>α</sub> , E <sub>μ</sub> ) 404, 404   | <0.00001             |
| 4.3               |                                                      | 445.3.11 vs F.6_CBE KO                                                     | (3'E <sub>α</sub> , E <sub>μ</sub> ) 404, 404   | <0.00001             |
| 5.1               | E <sub>μ</sub> - Site I.3 - E <sub>VH1</sub>         | 445.3.11 vs V <sub>H</sub> Pr KO                                           | (E <sub>μ</sub> , Site I.3) 404, 404            | 0.0015               |
|                   |                                                      |                                                                            | (Site I.3, E <sub>VH1</sub> ) 404, 404          | <0.00001             |
|                   |                                                      |                                                                            | (E <sub>μ</sub> , E <sub>VH1</sub> ) 404, 404   | 0.0049               |
| 5.2               | E <sub>μ</sub> - Site I.3 - E <sub>VH1</sub>         | 445.3.11 vs E <sub>VH1</sub> KO                                            | (E <sub>μ</sub> , Site I.3) 404, 404            | <0.00001             |
|                   |                                                      |                                                                            | (Site I.3, E <sub>VH1</sub> ) 404, 404          | <0.00001             |
|                   |                                                      |                                                                            | (E <sub>μ</sub> , E <sub>VH1</sub> ) 404, 404   | 0.0423               |
| 5.3               | E <sub>μ</sub> - Site I.3 - E <sub>VH1</sub>         | 445.3.11 vs F.6_CBE KO                                                     | (E <sub>μ</sub> , Site I.3) 404, 404            | 0.0088               |
|                   |                                                      |                                                                            | (Site I.3, E <sub>VH1</sub> ) 404, 404          | <0.00001             |
|                   |                                                      |                                                                            | (E <sub>μ</sub> , E <sub>VH1</sub> ) 404, 404   | <0.00001             |

**1** Related to Figures 3, 6, 7.

**2** The number of alleles for each genotype and probe pair.

**3** P-values are reported comparing the pairwise spatial distance between two probes and are calculated with the Mann-Whitney U-test using GraphPad Prism software.



### Supplementary Table 8: Primers for VDJ-seq.

| Oligonucleotides<br>Adapter           | Sequence                                                                                  | Reference  |
|---------------------------------------|-------------------------------------------------------------------------------------------|------------|
| VDJseq F (Mix 1)                      | ACACTCTTTCCCTACACGACGCTCTTCCGATCTNNNNN<br>NGACTCG*T                                       | 14         |
| VDJseq R (Mix 1)                      | /5Phos/CGAGTCNNNNNAGATCGGAAGAG*C/3SpC3/                                                   | 14         |
| VDJseq F (Mix 2)                      | ACACTCTTTCCCTACACGACGCTCTTCCGATCTNNNNN<br>NCTGCTCC*T                                      | 14         |
| VDJseq R (Mix 2)<br><b>Enrichment</b> | /5Phos/GGAGCAGNNNNNAGATCGGAAGAG*C/3SpC3/<br><b>Biotinylated extension primer sequence</b> | 14         |
| JH1 enrichment R                      | /5Biosg/AGCCAGCTTACCTGAGGAGAC                                                             | This study |
| JH2 enrichment R                      | /5Biosg/GAGAGGTTGTAAGGACTCACCTG                                                           | This study |
| JH3 enrichment R                      | /5Biosg/AGTTAGGACTCACCTGCAGAGAC                                                           | This study |
| JH4 enrichment R                      | /5Biosg/AGGCCATTCTTACCTGAGGAG                                                             | This study |
| <b>PCR Primers</b>                    |                                                                                           |            |
| Short PE1/ <i>i5</i>                  | ACACTCTTTCCCTACACGACGCTC*T                                                                | 15         |
| J <sub>H1</sub> / <i>i7</i> at 5' end | GTGACTGGAGTTCAGACGTGTGCTCTTCCGATCT<br>TTACCTGAGGAGACGGTGACC*G                             | This study |
| J <sub>H2</sub> / <i>i7</i> at 5' end | GTGACTGGAGTTCAGACGTGTGCTCTTCCGATCT<br>GGA CTACCTGAGGAGACTGTG*A                            | This study |
| J <sub>H3</sub> / <i>i7</i> at 5' end | GTGACTGGAGTTCAGACGTGTGCTCTTCCGATCT<br>GGA CTACCTGCAGAGACAGTGA*C                           | This study |
| J <sub>H4</sub> / <i>i7</i> at 5' end | GTGACTGGAGTTCAGACGTGTGCTCTTCCGATCT<br>CCATTCTTACCTGAGGAGACGGTG*A                          | This study |

**Supplementary Table 9. Primers and probes for 3C assays.**

| Primer       | TagMan Probe                 | Sequence                                | Reference  |
|--------------|------------------------------|-----------------------------------------|------------|
| $E\mu$       |                              | TCCACACAAAGACTCTGGACCTCT                | 16         |
|              | <b>A (<math>E\mu</math>)</b> | TGGCTTACCATTTGCGGTGCCTGGTTT             | 16         |
| T.H (hs3b,4) |                              | GCCCCTAAGACCCTACTCTGCTA                 | 16         |
|              | <b>H (hs3b,4)</b>            | TGACTCATCCACATCACCTTGCCT                | 16         |
| IGCR1        |                              | AGCCTCAAGTTCCTTCAGGGC                   | This study |
| VH81X        |                              | GAACATTCTGGGAACAGTATTAGGATG             | This study |
| Q52.2.4      |                              | CTGGATGCCTGTCTCCTGTAG                   | This study |
| Q52.3.8      |                              | CTACTGTGGTAGCTTCTACCCG                  | This study |
| 7183.7.10    |                              | GTGAAGGACTTTGCAGGTTGGAC                 | This study |
| Q52.5.13     |                              | AAGACTCCCATTCTCTGAGACTGG                | This study |
| 7183.14.25   |                              | TTGCACTGCACATCACTGCTGG                  | This study |
| la1          |                              | GGAAGGGAATGGGCATTAATGCATTAAG            | This study |
| la2          |                              | CAGCTGTAGTGATGGTAATAAAGTG               | This study |
| la3          |                              | CGAGTAAATGGGGACAGGGGAAAT                | This study |
| la4          |                              | CTTAGCCTTTTCGGTATTCCTCC                 | This study |
| la5          |                              | GGTATCCAGAACTTGATGTGGTGA                | This study |
| I.1          |                              | GTCGTCTACTACACACAGGAGC                  | This study |
| I.1a         |                              | GAAAACAAACTCAAAGACAACTACATGATA          | This study |
| I.1b         |                              | CCAGATACATAGAATAGGAGAGAAGAC             | This study |
| I.1c         |                              | CGGAGAAGATCAAATTGAAAATCCTCTC            | This study |
| I.1d         |                              | GGACCCATCCAACCATCTTTGAAATG              | This study |
| I.1e         |                              | GACTGTTGTTGACAGATTTGGCATTG              | This study |
| I.1f         |                              | CTGGACTGTAAAGCCAGTTCCAC                 | This study |
| I.1g         |                              | CTGGAGTCTGGCACCATCATCAT                 | This study |
| I.1h         |                              | GATAAACTGAAGGTCTGCCCACTC                | This study |
| I.1i         |                              | CTCTCTGAGCTCAGGAATTCCAG                 | This study |
| I.1j         |                              | CAAGAACAATTTGAGTCAGATCTTCTG             | This study |
| I.2          |                              | CGTTATGCTTTTAATTTGCTCACTTATAAG          | This study |
| I.2a         |                              | CAATACCCATATGGTATTTTCAACAATTTTTCG       | This study |
| I.3          |                              | TCCTACTTCTGTCTGAGGAAATTTTCG             | This study |
| I.3a         |                              | CTCAGGAATTCGAGCAGAAGAT                  | This study |
| I.3b         |                              | ACAACTCTGAAGAAGGTCCGAAGGT               | This study |
|              | <b>P_Site I.1</b>            | CCTGTGGGACTCTAAGCCCATGTCAG              | This study |
|              | <b>P_Site I.3</b>            | TGATATTGTATCTAAGTGGTCTGCACATGTC<br>TCAG | This study |
| 5'F.0        |                              | ATTCTTCTCAATCCTGGGACTAGT                | This study |
| F.0          |                              | TGTCTGCATGGTGTTCCTTTCATAC               | This study |
| F.1          |                              | TAGTGCAGCTTCCACTTAAAGAAC                | This study |
| F.2          |                              | GACACCATGGAGATGGATCATC                  | This study |
| F.3          |                              | CCTCCTGCAGCAGGGTTATTC                   | This study |
| F.4          |                              | CCCACAAATGCCAGACTAAAGAAC                | This study |
| F.5          |                              | CACTTTGAAGCTGAAGACATTGAC                | This study |
| F.6          |                              | CTGAAAGCAGGCTATTCACCATG                 | This study |
| F.7          |                              | GCAAAGGACCTCTAAAGGATTGC                 | This study |
| F.8          |                              | GATTCCATAAACAGAACCCTAATGG               | This study |

|           |              |                                |            |
|-----------|--------------|--------------------------------|------------|
| F.9       |              | GCCTGTTTGTTGAGAAGTGCACA        | This study |
|           | <b>P_F.6</b> | AGAGCAACAAGGAAAAGCCATCTAAGCTCC | This study |
|           |              | AA                             |            |
| GD F      |              | AGGCTTCTGACCTGCATCTTGA         | 17         |
| GD R      |              | TTCCAGAGCATTGTCAGCAA           | 17         |
|           | <b>GD</b>    | ACCTTGCTACTCTCCCTGGTGTTTGTGG   | 17         |
| Mb1 F     |              | CCACGCACTAGAGAGAGACTCAA        | 18         |
| Mb1 R     |              | CCGCCTCACTTCCTGTTTCAGCCG       | 18         |
| C14 F     |              | ATAGGCCCTCCTCCCACCA            | 16         |
| (hs3b,4)  |              |                                |            |
| C14 R     |              | CATGCGTTTGTGTCTACATGC          | 16         |
| (hs3b,4)  |              |                                |            |
| C3 F (Eu) |              | GGTATCAAAGGACAGTGCTTAG         | This study |
| C3 R (Eu) |              | CAGCCTAGTTTAGCTTAGCG           | This study |

**Supplementary Table 10. In situ Hi-C Library Statistics**

|                                           | <b>Rag1-/-1</b>               | <b>Rag1-/-2</b>               | <b>Rag1-/-_merged_replicates</b> |
|-------------------------------------------|-------------------------------|-------------------------------|----------------------------------|
| <b>Sequenced Read Pairs</b>               | 704,893,796                   | 595,148,192                   | 1,300,041,988                    |
| <b>Normal Paired</b>                      | 145,215,091 (20.60%)          | 147,945,053 (24.86%)          | 293,160,144 (22.55%)             |
| <b>Chimeric Paired</b>                    | 475,045,221 (67.39%)          | 376,176,420 (63.21%)          | 851,221,641 (65.48%)             |
| <b>Chimeric Ambiguous</b>                 | 81,395,262 (11.55%)           | 68,035,698 (11.43%)           | 149,430,960 (11.49%)             |
| <b>Unmapped</b>                           | 3,238,222 (0.46%)             | 2,991,021 (0.50%)             | 6,229,243 (0.48%)                |
| <b>Alignable (Normal+Chimeric Paired)</b> | 620,260,312 (87.99%)          | 524,121,473 (88.07%)          | 1,144,381,785 (88.03%)           |
| <b>Unique Reads</b>                       | 478,530,695 (67.89%)          | 414,774,186 (69.69%)          | 885,121,908 (68.08%)             |
| <b>PCR Duplicates</b>                     | 136,259,276 (19.33%)          | 104,319,997 (17.53%)          | 248,853,403 (19.14%)             |
| <b>Optical Duplicates</b>                 | 5,470,341 (0.78%)             | 5,027,290 (0.84%)             | 10,406,474 (0.80%)               |
| <b>Library Complexity Estimate</b>        | 1,173,386,201                 | 1,111,955,039                 | 2,189,931,487                    |
| <b>Below MAPQ Threshold</b>               | 85,367,316 (12.11% / 17.84%)  | 75,979,254 (12.77% / 18.32%)  | 160,175,973 (12.32% / 18.10%)    |
| <b>Hi-C Contacts</b>                      | 393,163,379 (55.78% / 82.16%) | 338,794,932 (56.93% / 81.68%) | 724,945,935 (55.76% / 81.90%)    |
| <b>Inter-chromosomal</b>                  | 60,362,190 (8.56% / 12.61%)   | 53,686,252 (9.02% / 12.94%)   | 114,046,736 (8.77% / 12.88%)     |
| <b>Intra-chromosomal</b>                  | 332,801,189 (47.21% / 69.55%) | 285,108,680 (47.91% / 68.74%) | 610,899,199 (46.99% / 69.02%)    |
| <b>Short Range (&lt;20Kb)</b>             | 124,066,290 (17.60% / 25.93%) | 99,751,406 (16.76% / 24.05%)  | 216,820,141 (16.68% / 24.50%)    |
| <b>Long Range (&gt;20Kb)</b>              | 208,725,177 (29.61% / 43.62%) | 185,347,443 (31.14% / 44.69%) | 394,059,576 (30.31% / 44.52%)    |

|                                           | <b>Rag1-/-NE1-/-1</b>         | <b>Rag1-/-NE1-/-2</b>         | <b>Rag1-/-NE1-/-_merged_replicates</b> |
|-------------------------------------------|-------------------------------|-------------------------------|----------------------------------------|
| <b>Sequenced Read Pairs</b>               | 761,741,401                   | 736,789,530                   | 1,498,530,931                          |
| <b>Normal Paired</b>                      | 170,981,180 (22.45%)          | 161,579,433 (21.93%)          | 332,560,613 (22.19%)                   |
| <b>Chimeric Paired</b>                    | 501,909,501 (65.89%)          | 490,577,891 (66.58%)          | 992,487,392 (66.23%)                   |
| <b>Chimeric Ambiguous</b>                 | 85,210,925 (11.19%)           | 81,411,068 (11.05%)           | 166,621,993 (11.12%)                   |
| <b>Unmapped</b>                           | 3,639,795 (0.48%)             | 3,221,138 (0.44%)             | 6,860,933 (0.46%)                      |
| <b>Alignable (Normal+Chimeric Paired)</b> | 672,890,681 (88.34%)          | 652,157,324 (88.51%)          | 1,325,048,005 (88.42%)                 |
| <b>Unique Reads</b>                       | 517,825,831 (67.98%)          | 507,477,961 (68.88%)          | 1,014,856,941 (67.72%)                 |
| <b>PCR Duplicates</b>                     | 148,381,644 (19.48%)          | 138,830,218 (18.84%)          | 297,781,998 (19.87%)                   |
| <b>Optical Duplicates</b>                 | 6,683,206 (0.88%)             | 5,849,145 (0.79%)             | 12,409,066 (0.83%)                     |
| <b>Library Complexity Estimate</b>        | 1,264,111,007                 | 1,280,223,735                 | 2,436,635,481                          |
| <b>Below MAPQ Threshold</b>               | 92,053,634 (12.08% / 17.78%)  | 89,227,706 (12.11% / 17.58%)  | 179,928,939 (12.01% / 17.73%)          |
| <b>Hi-C Contacts</b>                      | 425,772,197 (55.89% / 82.22%) | 418,250,255 (56.77% / 82.42%) | 834,928,002 (55.72% / 82.27%)          |
| <b>Inter-chromosomal</b>                  | 42,925,248 (5.64% / 8.29%)    | 42,718,155 (5.80% / 8.42%)    | 85,641,452 (5.72% / 8.44%)             |
| <b>Intra-chromosomal</b>                  | 382,846,949 (50.26% / 73.93%) | 375,532,100 (50.97% / 74.00%) | 749,286,550 (50.00% / 73.83%)          |
| <b>Short Range (&lt;20Kb)</b>             | 137,296,147 (18.02% / 26.51%) | 135,640,527 (18.41% / 26.73%) | 263,861,777 (17.61% / 26.00%)          |
| <b>Long Range (&gt;20Kb)</b>              | 245,542,117 (32.23% / 47.42%) | 239,883,125 (32.56% / 47.27%) | 485,407,716 (32.39% / 47.83%)          |

**Supplementary Table 11. Public CHIP-seq data sets from Rag deficient pro-B cells.**

| <b>CHIP Seq1 *</b> | <b>Build</b> | <b>GEO accession #</b> | <b>File type</b> | <b>Reference</b> |
|--------------------|--------------|------------------------|------------------|------------------|
| Brg1               | Mm9          | GSM1635413             | Wig              | 19               |
| Ikaros             | Mm9          | <u>GSM1635411</u>      | Bedgraph         | 19               |
| E2A                | Mm8          | <u>GSM546523</u>       | Bed              | 20               |
| Med1               | Mm9          | <u>GSM1038263</u>      | Wig              | 21               |
| H3K27ac            | Mm9          | <u>GSM2255552</u>      | BigWig           | 22               |
| H3K4me1            | Mm8          | <u>GSM546527</u>       | BigWig           | 20               |
| PU.1               | Mm9          | GSM539537              | Wig              | 23               |
| P300               | Mm9          | GSM987808              | Bed              | 24               |
| H3K4me3            | Mm9          | GSM4350110             | BigWig           | 25               |
| Pax5               | Mm9          | <u>GSM4805384</u>      | Bedgraph         | 26               |
| IRF4               | Mm9          | <u>GSM1296534</u>      | BigWig           | 27               |
| CTCF               | Mm9          | GSM1156665             | BigWig           | 28               |
| Rad21              | Mm9          | GSM1156667             | BigWig           | 28               |
| RNA_Seq            | Mm9          | <u>GSM1006370</u>      | Bedgraph         | 29               |

\* All data sets were converted to mm9.

## REFERENCES

- 1 Shen, H. M. *et al.* Loop extrusion promotes an alternate pathway for isotype switching. *Cell Rep* **37**, 110059, doi:10.1016/j.celrep.2021.110059 (2021).
- 2 Dai, H. Q. *et al.* Loop extrusion mediates physiological Igh locus contraction for RAG scanning. *Nature* **590**, 338-343, doi:10.1038/s41586-020-03121-7 (2021).
- 3 Oudinet, C., Braikia, F. Z., Dauba, A. & Khamlichi, A. A. Recombination may occur in the absence of transcription in the immunoglobulin heavy chain recombination centre. *Nucleic Acids Res*, doi:10.1093/nar/gkaa108 (2020).
- 4 Braikia, F. Z. *et al.* Developmental Switch in the Transcriptional Activity of a Long-Range Regulatory Element. *Mol Cell Biol* **35**, 3370-3380, doi:10.1128/MCB.00509-15 (2015).
- 5 Bolland, D. J. *et al.* Antisense intergenic transcription in V(D)J recombination. *Nat Immunol* **5**, 630-637, doi:10.1038/ni1068 (2004).
- 6 Guo, C. *et al.* CTCF-binding elements mediate control of V(D)J recombination. *Nature* **477**, 424-430, doi:10.1038/nature10495 (2011).
- 7 Perlot, T., Alt, F. W., Bassing, C. H., Suh, H. & Pinaud, E. Elucidation of IgH intronic enhancer functions via germ-line deletion. *Proc Natl Acad Sci U S A* **102**, 14362-14367, doi:10.1073/pnas.0507090102 (2005).
- 8 Puget, N. *et al.* Insertion of an imprinted insulator into the IgH locus reveals developmentally regulated, transcription-dependent control of V(D)J recombination. *Mol Cell Biol* **35**, 529-543, doi:10.1128/MCB.00235-14 (2015).
- 9 Rhinn, H. *et al.* Housekeeping while brain's storming Validation of normalizing factors for gene expression studies in a murine model of traumatic brain injury. *BMC Mol Biol* **9**, 62, doi:1471-2199-9-62 [pii] 10.1186/1471-2199-9-62 (2008).
- 10 Espinoza, C. R. & Feeney, A. J. The extent of histone acetylation correlates with the differential rearrangement frequency of individual VH genes in pro-B cells. *J Immunol* **175**, 6668-6675, doi:10.4049/jimmunol.175.10.6668 (2005).
- 11 Volpi, S. A. *et al.* Germline deletion of Igh 3' regulatory region elements hs 5, 6, 7 (hs5-7) affects B cell-specific regulation, rearrangement, and insulation of the Igh locus. *J Immunol* **188**, 2556-2566, doi:10.4049/jimmunol.1102763 (2012).
- 12 Subrahmanyam, R. *et al.* Localized epigenetic changes induced by DH recombination restricts recombinase to DJH junctions. *Nature immunology* **13**, 1205-1212, doi:10.1038/ni.2447 (2012).
- 13 Gerasimova, T. *et al.* A structural hierarchy mediated by multiple nuclear factors establishes IgH locus conformation. *Genes Dev* **29**, 1683-1695, doi:10.1101/gad.263871.115 (2015).
- 14 Matheson, L. S. *et al.* Local Chromatin Features Including PU.1 and IKAROS Binding and H3K4 Methylation Shape the Repertoire of Immunoglobulin Kappa Genes Chosen for V(D)J Recombination. *Front Immunol* **8**, 1550, doi:10.3389/fimmu.2017.01550 (2017).
- 15 Kleiman, E., Loguercio, S. & Feeney, A. J. Epigenetic Enhancer Marks and Transcription Factor Binding Influence V kappa Gene Rearrangement in Pre-B Cells and Pro-B Cells. *Front Immunol* **9**, 2074, doi:10.3389/fimmu.2018.02074 (2018).
- 16 Feldman, S. *et al.* Constraints contributed by chromatin looping limit recombination targeting during Ig class switch recombination. *J Immunol* **194**, 2380-2389, doi:10.4049/jimmunol.1401170 (2015).
- 17 Kumar, S. *et al.* Flexible ordering of antibody class switch and V(D)J joining during B-cell ontogeny. *Genes Dev* **27**, 2439-2444, doi:10.1101/gad.227165.113 (2013).
- 18 Wang, L., Whang, N., Wuerffel, R. & Kenter, A. L. AID-dependent histone acetylation is detected in immunoglobulin S regions. *J Exp Med* **203**, 215-226, doi:jem.20051774 [pii] 10.1084/jem.20051774 (2006).
- 19 Bossen, C. *et al.* The chromatin remodeler Brg1 activates enhancer repertoires to establish B cell identity and modulate cell growth. *Nat Immunol* **16**, 775-784, doi:10.1038/ni.3170 (2015).
- 20 Lin, Y. C. *et al.* A global network of transcription factors, involving E2A, EBF1 and Foxo1, that orchestrates B cell fate. *Nat Immunol* **11**, 635-643, doi:10.1038/ni.1891 (2010).

- 21 Whyte, W. A. *et al.* Master transcription factors and mediator establish super-enhancers at key cell identity genes. *Cell* **153**, 307-319, doi:10.1016/j.cell.2013.03.035 (2013).
- 22 Smeenk, L. *et al.* Molecular role of the PAX5-ETV6 oncoprotein in promoting B-cell acute lymphoblastic leukemia. *EMBO J* **36**, 718-735, doi:10.15252/emboj.201695495 (2017).
- 23 Mullen, A. C. *et al.* Master transcription factors determine cell-type-specific responses to TGF-beta signaling. *Cell* **147**, 565-576, doi:10.1016/j.cell.2011.08.050 (2011).
- 24 Lin, Y. C. *et al.* Global changes in the nuclear positioning of genes and intra- and interdomain genomic interactions that orchestrate B cell fate. *Nat Immunol* **13**, 1196-1204, doi:10.1038/ni.2432 (2012).
- 25 Hill, L. *et al.* Wapl repression by Pax5 promotes V gene recombination by Igh loop extrusion. *Nature* **584**, 142-147, doi:10.1038/s41586-020-2454-y (2020).
- 26 Ramamoorthy, S. *et al.* EBF1 and Pax5 safeguard leukemic transformation by limiting IL-7 signaling, Myc expression, and folate metabolism. *Genes Dev* **34**, 1503-1519, doi:10.1101/gad.340216.120 (2020).
- 27 Schwickert, T. A. *et al.* Stage-specific control of early B cell development by the transcription factor Ikaros. *Nat Immunol* **15**, 283-293, doi:10.1038/ni.2828 (2014).
- 28 Choi, N. M. *et al.* Deep sequencing of the murine IgH repertoire reveals complex regulation of nonrandom V gene rearrangement frequencies. *J Immunol* **191**, 2393-2402, doi:10.4049/jimmunol.1301279 (2013).
- 29 Verma-Gaur, J. *et al.* Noncoding transcription within the Igh distal V(H) region at PAIR elements affects the 3D structure of the Igh locus in pro-B cells. *Proc Natl Acad Sci U S A* **109**, 17004-17009, doi:10.1073/pnas.1208398109 (2012).
